# Supplementary material
Source: publisher figshare collection journal article supplement (https://acs.figshare.com/ndownloader/files/3741814)
Supplement: Supplementary file 1 [file 3741814]

Supporting information for:

## **Direct Synthesis of Unilamellar MgAl-LDH Nanosheets: Stacking in Aqueous Solution**

Dujuan Liang, Wenbo Yue, Genban Sun, Dong Zheng, Kenta Ooi and Xiaojing

Yang\*

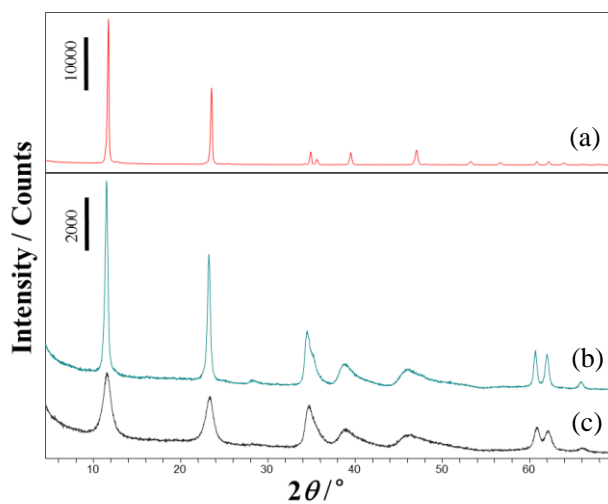

**Figure S1.** XRD pattern of MgAl-LDH for (a) synthesized by homogenous precipitation method,<sup>25</sup> (b)  $\text{Na}_2\text{CO}_3$ - and (c) water-washed sample.

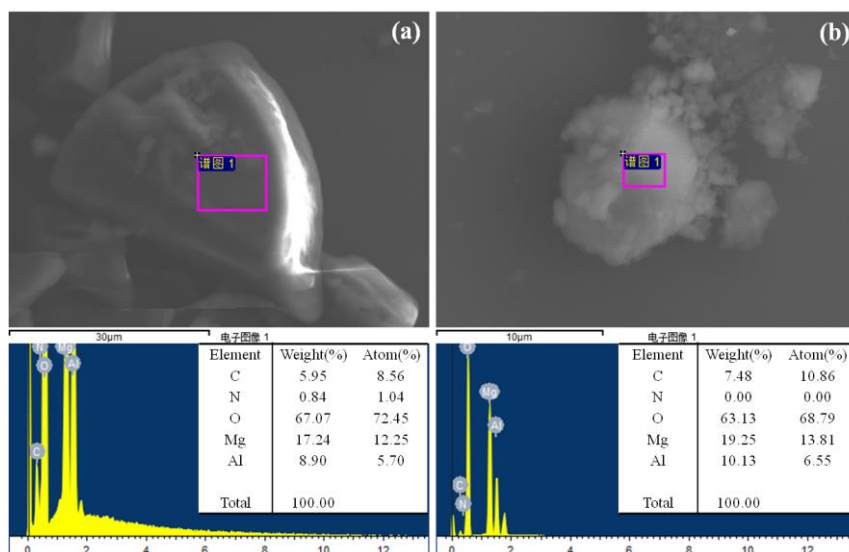

**Figure S2.** EDX result of (a) water- and (b) Na<sub>2</sub>CO<sub>3</sub>-washed samples. The Mg/Al ratios are close to 2.

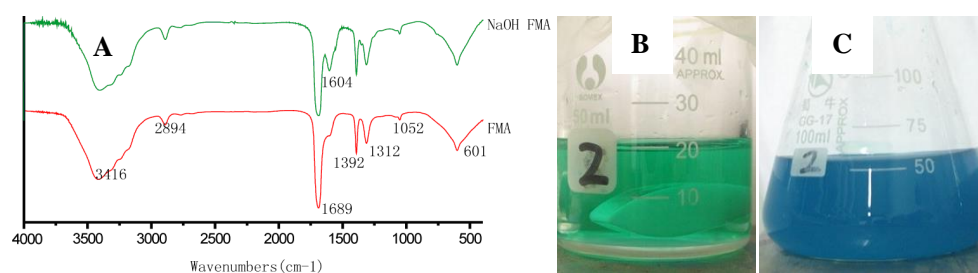

**Figure S3.** (A) FT-IR spectra for formamide (FMA) and the product obtained after FMA mixed with NaOH for 30 min. The 1604cm<sup>-1</sup> band of C=O in -COO<sup>-</sup> indicate the HCOO<sup>-</sup> generation; (B) before and (C) after add NaOH-formamide solution to green Ni<sup>2+</sup>, blue [Ni(NH<sub>3</sub>)<sub>6</sub>]<sup>2+</sup> can prove the large amount of NH<sub>3</sub> existence.

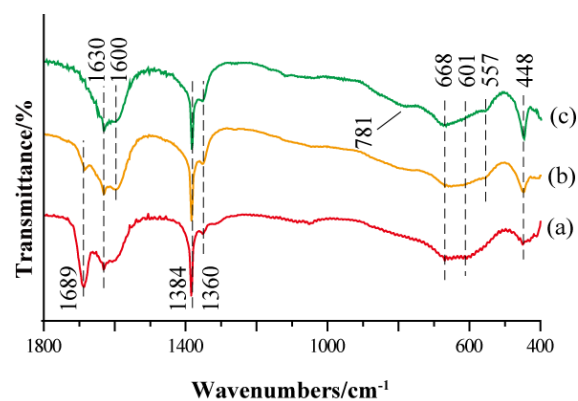

**Figure S4.** FT-IR spectra of as-prepared R2.0 sample after washed by water 1(a), 3 (b) and 5 (c) times, exhibiting the removal process of formamide during washing the as-prepared sample using decarbonized water, which is characterized by the disappearance of the bands at 1689 and 601  $\text{cm}^{-1}$ .

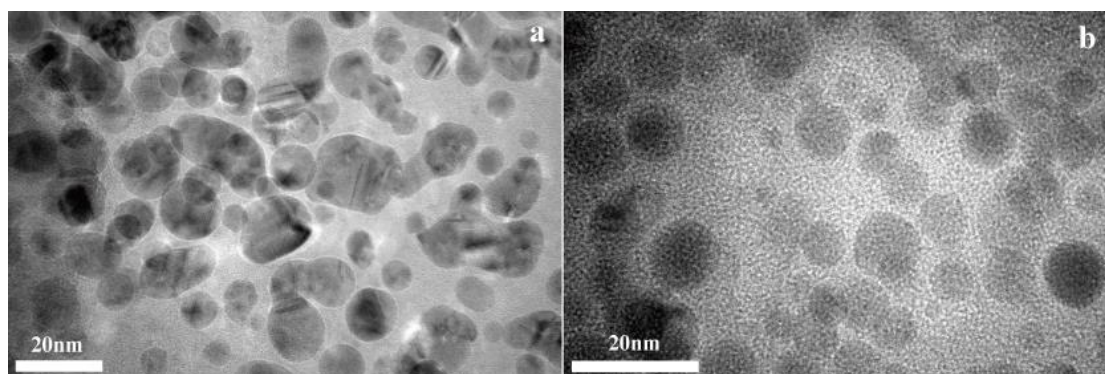

**Figure S5.** TEM images for nanosheets (a) before and (b) after removing extra salts and hydrothermal aging. Chen et al.<sup>32</sup> pointed out that extra metal cation and inorganic anions can cause LDH nanosheets' aggregation effectively in aqueous solution. The remove-extra-salts method of redispersing the centrifuged original gel to pure formamide can facilitate evenness in diameter and form regular round shape through Brownian motion and Ostwald ripening.

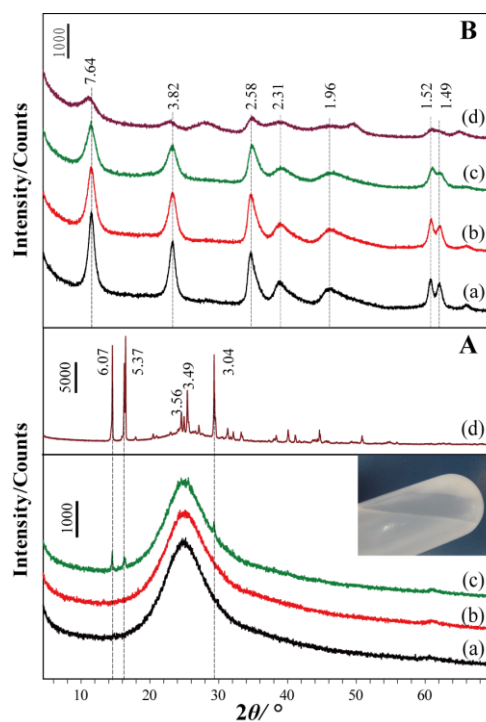

**Figure S6.** XRD patterns in (A) wet-state with FMA and (B) dry-state after  $\text{Na}_2\text{CO}_3(\text{aq})$  washing, (a) (b) (c) and (d) corresponding to room temperature (RT), 60, 80 and 100°C aging temperature for 1 day. The inset is the photo of 80 °C-sample after centrifugation. As temperature increases, unidentified crystallites appear. After washing with  $\text{Na}_2\text{CO}_3$  colloid nanosheets can stack to sharper diffraction peaks, while crystallite cannot.

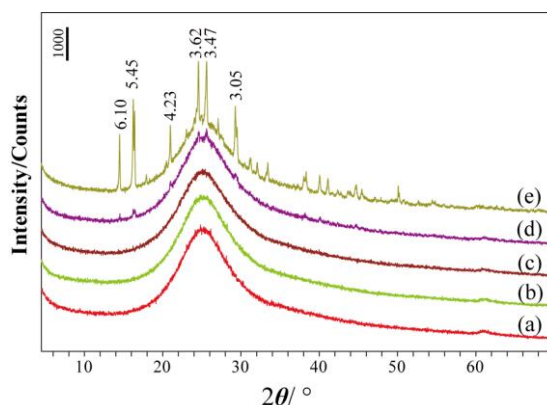

**Figure S7.** XRD patterns of the samples for different time at 60 °C, (a) (b) (c) (d) (e) corresponding to the aging time of 1, 2, 3, 4, 5 days. Long-time heating could get analogous result

with high-temperature heating (Figure S4). Excessive temperature and time will decrease the stability of 2D sheets.

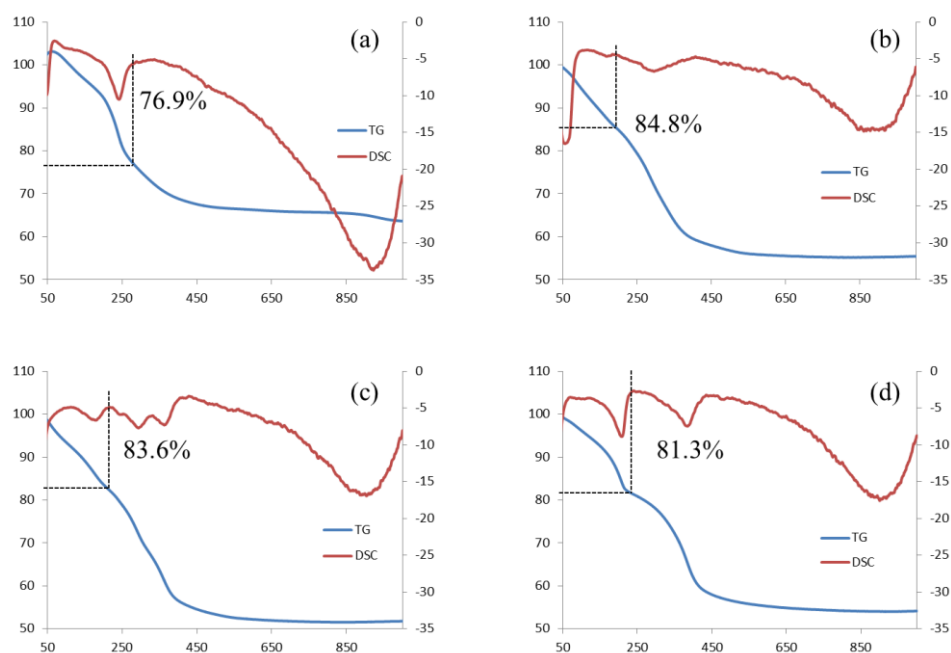

**Figure S8.** The TG-DSC curves of R0.8 (a), R1.0 (b) R2.0 (c) water-washed samples and R2.0  $\text{Na}_2\text{CO}_3$ -washed sample (d). The weight losses around 250 °C corresponding to the loss of interlayered water with endothermic peaks. The different intercalated species lead to the different weight loss temperatures and thermal analysis.

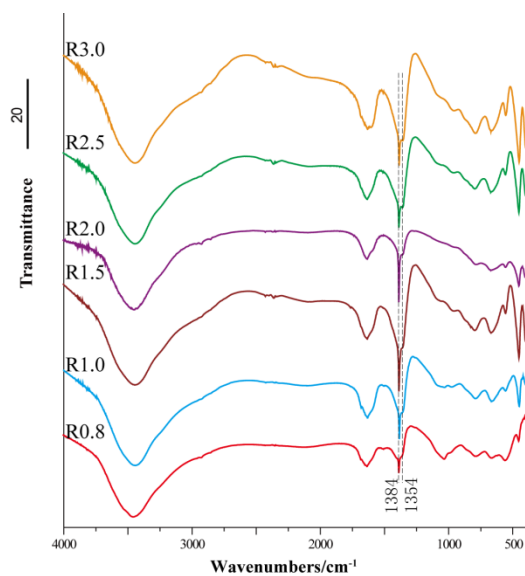

**Figure S9.** The FT-IR spectra for water-washed samples. Both the bands of nitrate (1384  $[v(\text{NO}_3^-)]$ ) and carbonate (1360 ( $v_{\text{C-O}}$ ) and 781 ( $\delta_{\text{C-O}}$ )  $\text{cm}^{-1}$ ) exist.

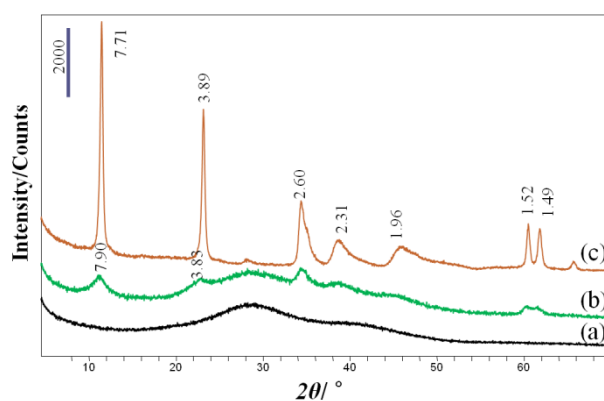

**Figure S10.** XRD patterns of synthetic  $\text{Al}(\text{OH})_3$  (a) and transferred  $\text{MgAl-CO}_3^{2-}$ -LDH under RT (b) and 100 °C-20h hydrothermal treatment (c). we add alkaline solution (aq) of  $\text{NaOH}$  and  $\text{CO}_3^{2-}$  to a suspension (aq) of  $\text{Mg}^{2+}$  and  $\text{Al}(\text{OH})_3$  ( $\text{Mg}/\text{Al}=2$ ) and results to a typical  $\text{CO}_3^{2-}$ -LDH XRD diffraction pattern.

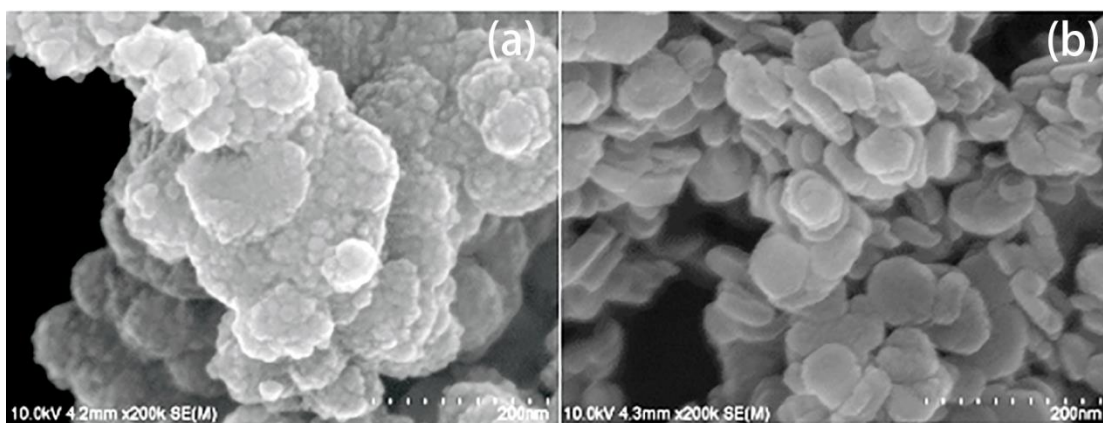

**Figure S11.** SEM images of Al(OH)<sub>3</sub> (a) and hydrothermal-treatment transferred hexagon shape MgAl-CO<sub>3</sub><sup>2-</sup>-LDH for well growth in 3D (b). The formation of small LDH particles is based on Al(OH)<sub>3</sub> skeleton and then small particles grow up though Brownian motion and collision.

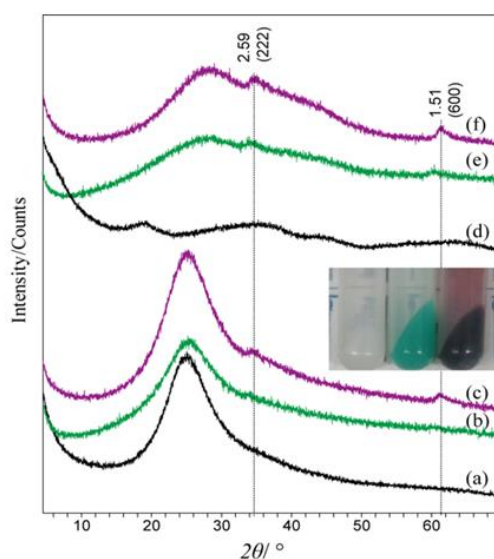

**Figure S12.** XRD patterns of ZnAl (a) (d), NiAl (b) (e), and CoAl (c) (f) systems synthesized by the same method as MgAl. (a)-(c) are colloids showing no clear 2D characteristic diffraction peak, and (e)-(f) are water-washed state showing little lamellas restack to diffract 3D peaks. The inset is colloids images of the three systems after centrifuging, and the colors are derived from [Zn(NH<sub>3</sub>)<sub>4</sub>]<sup>2+</sup>, [Ni(NH<sub>3</sub>)<sub>6</sub>]<sup>2+</sup> and [Co(NH<sub>3</sub>)<sub>6</sub>]<sup>2+</sup> complex ions. Zn(OH)<sub>2</sub>, Ni(OH)<sub>2</sub>, Co(OH)<sub>2</sub> and Al(OH)<sub>3</sub> all are amphoteric.

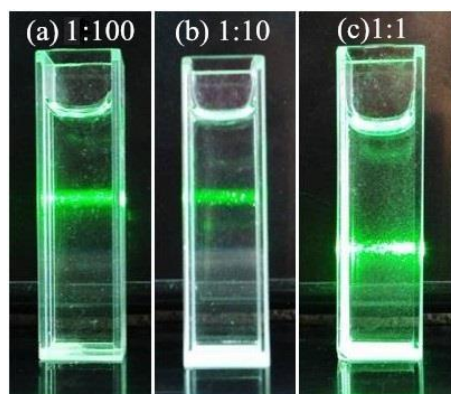

**Figure S13.** The Tyndall effects of different water: formamide (volume ratio) reagent to exfoliate  $\text{MgAl-NO}_3\text{-LDH}$ . Some crystal can be seen in the light path under ratio 1:10, and the light path is discontinuous when the ratio up to 1:1.



**Table S1. The Concentration of Mg and Al in Aqueous Solution during Transformation**

| <b>Process</b>  |                  |             |                     |
|-----------------|------------------|-------------|---------------------|
| c (mg/L)        | RT for 5 seconds | RT for 1day | 100 °C for 20 hours |
| Mg              | 0.368            | 0.295       | 0.329               |
| Al <sup>a</sup> | —                | —           | —                   |

<sup>a</sup>“—” means the tested data are below 0.001 mg/L

**Table S2. The CHN Analyses of Some Samples**

| samples                                 |      | N%   | C%   | H%    |
|-----------------------------------------|------|------|------|-------|
| water-washed                            | R0.8 | 0.18 | 2.29 | 3.789 |
|                                         | R1.0 | 0.61 | 2.83 | 4.188 |
|                                         | R1.5 | 1.65 | 2.49 | 3.776 |
|                                         | R2.0 | 1.54 | 3.87 | 3.957 |
|                                         | R2.5 | 1.14 | 3.45 | 3.895 |
|                                         | R3.0 | 0.98 | 3.28 | 3.606 |
| Na <sub>2</sub> CO <sub>3</sub> -washed | R2.0 | 0.01 | 3.10 | 4.088 |

**Table S3. Mg/Al Ratios Analyzed for the Rx Samples after Different Wash Time**

| Mg/Al            | R0.8 | R1.0 | R1.5 | R2.0 | R2.5 | R3.0 |
|------------------|------|------|------|------|------|------|
| Wash 30 min/time | 0.12 | 0.39 | 1.18 | 1.68 | 1.64 | 1.62 |
| Wash 5 min/time  | 0.42 | 1.03 | 1.90 | 1.92 | 1.89 | 1.98 |
